# Supplementary material
Source: publisher figshare collection journal article supplement (https://acs.figshare.com/ndownloader/files/31097656)
Supplement: Supplementary file 1 [file 31097656]

# Regionalized Life Cycle Greenhouse Gas Emissions of Forest Biomass Use for Electricity Generation in the United States

*Hui Xu,<sup>1</sup> Gregory Latta,<sup>2</sup> Uisung Lee,<sup>1</sup> Jan Lewandrowski,<sup>3</sup> Michael Wang<sup>1</sup>*

<sup>1</sup> Systems Assessment Group, Energy Systems Division, Argonne National Laboratory, 9700 South Cass Avenue, Lemont, IL 60439, United States

<sup>2</sup> Department of Natural Resources and Society, University of Idaho, 875 Perimeter Drive MS 1139, Moscow, ID 83844, United States

<sup>3</sup> Office of the Chief Economist, United States Department of Agriculture, 1280 Maryland Ave SW, Washington, DC 20250, United States

## Supporting Information Contents

|                                                                                                                                                                                                                                                                                                                                               |          |
|-----------------------------------------------------------------------------------------------------------------------------------------------------------------------------------------------------------------------------------------------------------------------------------------------------------------------------------------------|----------|
| <b>Supporting Figures.....</b>                                                                                                                                                                                                                                                                                                                | <b>4</b> |
| Figure S1. Locations of simulated bioelectricity facilities .....                                                                                                                                                                                                                                                                             | 4        |
| Figure S2. System boundaries for pulp log, logging residue, lumber mill residue, and pellet-based pathways. Energy use and emissions associated with lumber mill operations are allocated between main product (lumber) and mill residues, using economic and mass allocation methods.....                                                    | 5        |
| Figure S3. State-level life cycle GHG emissions of forest-residues-to-bioelectricity pathways.....                                                                                                                                                                                                                                            | 6        |
| (g CO <sub>2</sub> e/kWh). Lumber mill share is based on mass-balance allocation.....                                                                                                                                                                                                                                                         | 6        |
| Figure S4. State-level life-cycle GHG emissions (g CO <sub>2</sub> e/kWh)of forest-residues-to-bioelectricity pathways considering black carbon emissions. Lumber mill share is based on market-value allocation. ....                                                                                                                        | 6        |
| Figure S5. Boundaries of North American Electric Reliability Corporation (NERC) regions in the conterminous United States and spatial pattern of carbon intensities of grid electricity (g CO <sub>2</sub> e/kWh) across NERC regions. Carbon intensities of electricity generation at the NERC level are obtained from the GREET model. .... | 7        |
| Figure S6. Sensitivity analysis results for the state-level life-cycle GHG emissions of forest to electricity pathways.....                                                                                                                                                                                                                   | 8        |
| <b>Supporting Tables.....</b>                                                                                                                                                                                                                                                                                                                 | <b>9</b> |
| Table S1. Assumptions for the hypothetical woody biomass power plant. ....                                                                                                                                                                                                                                                                    | 9        |
| Table S2. Fuel and material inputs for site preparation, planting, and stand management. Natural regeneration is assumed for Northeast/North Central, thus there are no energy/material inputs. ....                                                                                                                                          | 9        |
| Table S3. Energy inputs for logging in the Pacific Northwest region. Data is adapted from Oneil et al. (2017). <sup>1</sup> .....                                                                                                                                                                                                             | 10       |
| Table S4. Energy inputs for logging in the Inland Pacific Northwest region. Data is adapted from Oneil et al. (2010). <sup>2</sup> .....                                                                                                                                                                                                      | 10       |

|                                                                                                                                                                                                                                                                                                                                         |    |
|-----------------------------------------------------------------------------------------------------------------------------------------------------------------------------------------------------------------------------------------------------------------------------------------------------------------------------------------|----|
| Table S5. Energy inputs for logging in the Northcentral region (except Tennessee). Data is adapted from Oneil et al. (2010). <sup>2</sup> .....                                                                                                                                                                                         | 10 |
| Table S6. Energy inputs for logging in Tennessee. Data is adapted from Abbas et al. (2018). <sup>3</sup> .....                                                                                                                                                                                                                          | 10 |
| Table S7. Energy inputs for logging in the Northeast. Data is adapted from Quinn et al. (2020). <sup>4</sup>                                                                                                                                                                                                                            | 11 |
| Table S8. Energy inputs for logging in the Southeast region. Data is adapted from Lan et al. (in review). <sup>5</sup> .....                                                                                                                                                                                                            | 11 |
| Table S9. Energy inputs for logging residues recovery. Data is adapted from Han et al. (2018) <sup>6</sup> and Lan et al. (in review). <sup>5</sup> .....                                                                                                                                                                               | 11 |
| Table S10. Energy inputs for wood pellets production. Data for Southeast and Pacific Northwest regions are derived from Morrison and Gordon (2017) <sup>7</sup> and Brackely et al. (2017), <sup>8</sup> respectively. ....                                                                                                             | 11 |
| Table S11. Break-down of life cycle GHG emissions by state for the pulpwood (softwood) to electricity pathway. States with zero transportation emissions indicate that pulpwood is not included in biomass supply mix simulated by LURA; values for other stages are included here for reference. ....                                  | 12 |
| Table S12. Break-down of life cycle GHG emissions by state for the logging residues (softwood) to electricity pathway. States with zero transportation emissions indicate that logging residues are not included in biomass supply mix simulated by LURA; values for other stages are included here for reference. ....                 | 12 |
| Table S13. Break-down of life cycle GHG emissions by state for the mill residues (sawdust and shavings, softwood) to electricity pathway. States with zero transportation emissions indicate that mill residues are not included in biomass supply mix simulated by LURA; values for other stages are included here for reference. .... | 12 |
| Table S14. Break-down of life cycle GHG emissions by state for the wood pellet (sourced from pulpwood, softwood) to electricity pathway. States with zero transportation emissions indicate that mill residues are not included in biomass supply mix simulated by LURA; values for other stages are included here for reference. ....  | 13 |

Table S15. Break-down of life cycle GHG emissions by state for the wood pellet (sourced from pulpwood) to electricity pathway. States with zero transportation emissions indicate that mill residues are not included in biomass supply mix simulated by LURA; values for other stages are included here for reference. ....13

Table S16. Comparison of economic value versus mass based allocation factors used for the sawing process (log to rough green lumber) at lumber mill. States within the same region share the same allocation factors.....13

Table S17. Comparison of economic value versus mass based allocation factors used for the planning process (rough saw lumber to planned lumber) at lumber mill. States within the same region share the same allocation factors. ....14

## Supporting Figures

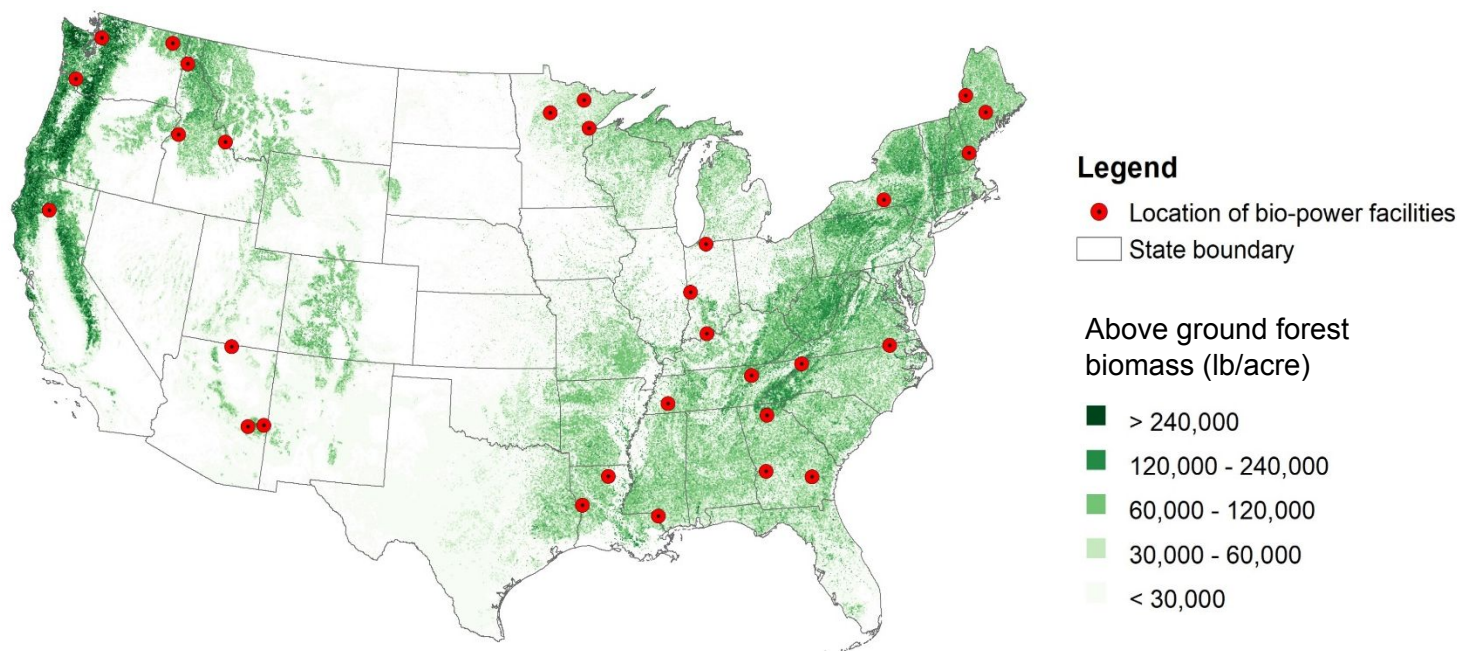

Figure S1. Locations of simulated bioelectricity facilities

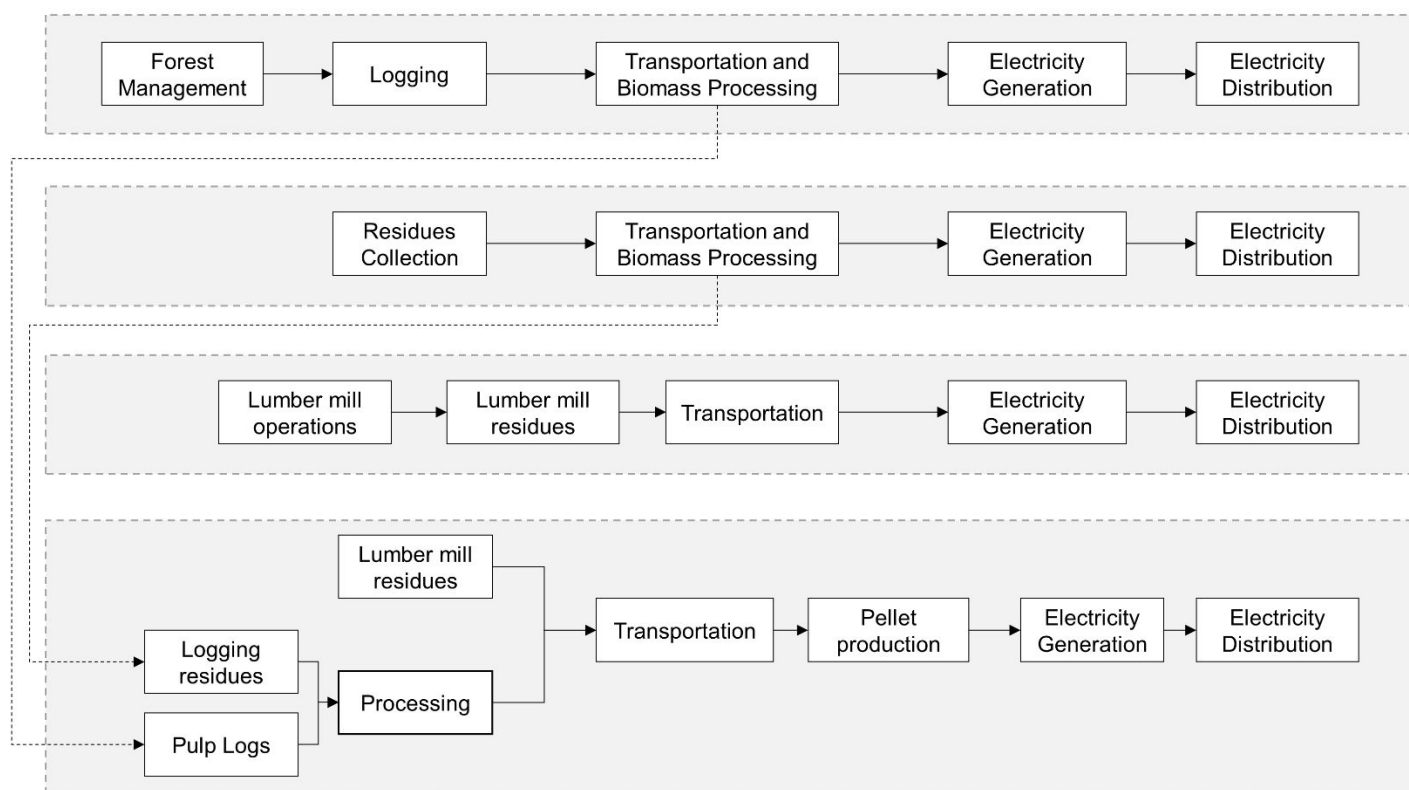

Figure S2. System boundaries for pulp log, logging residue, lumber mill residue, and pellet-based pathways. Energy use and emissions associated with lumber mill operations are allocated between main product (lumber) and mill residues, using economic and mass allocation methods.

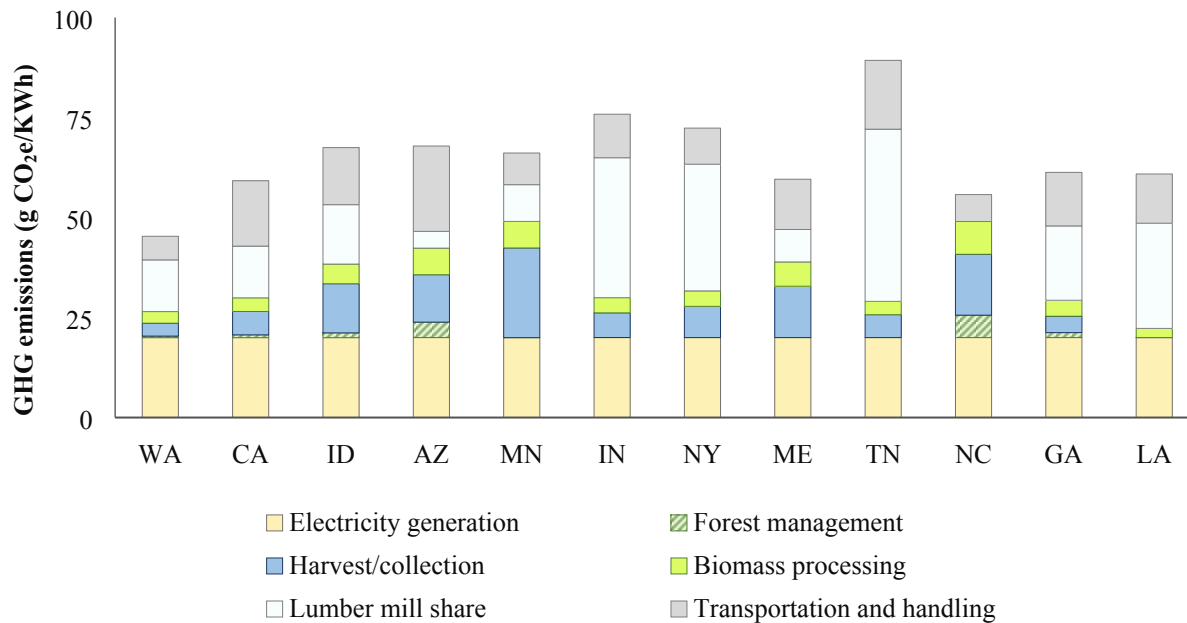

Figure S3. State-level life cycle GHG emissions of forest-residues-to-bioelectricity pathways (g CO<sub>2</sub>e/kWh). Lumber mill share is based on mass-balance allocation.

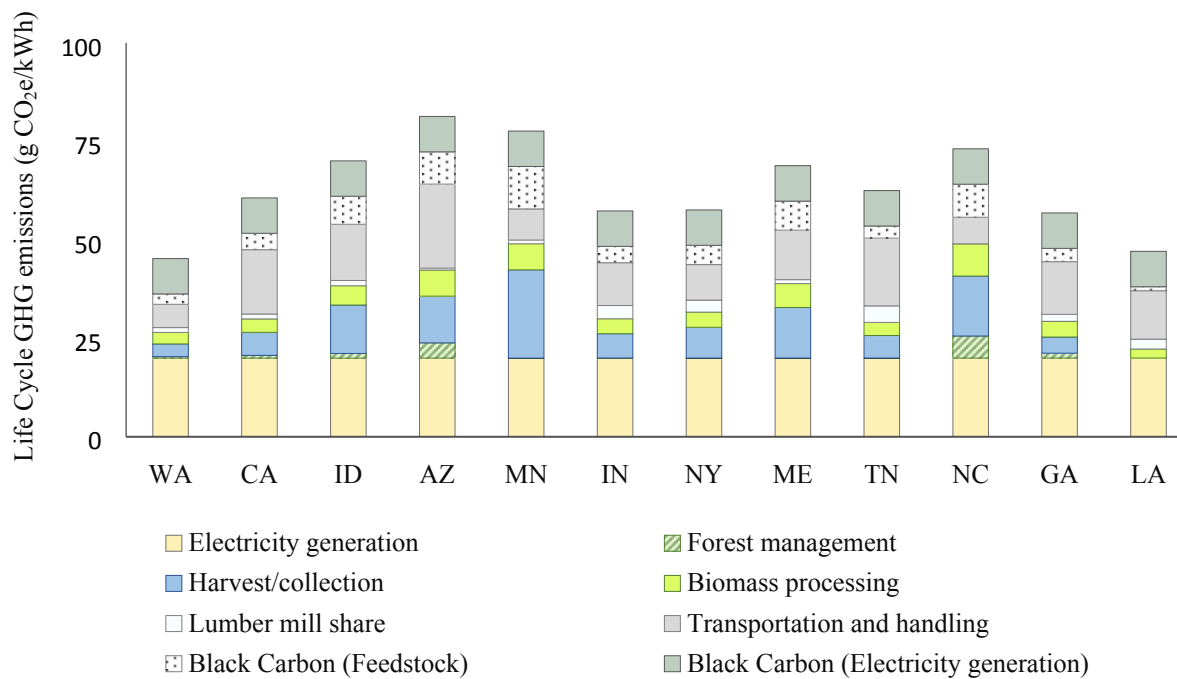

Figure S4. State-level life-cycle GHG emissions (g CO<sub>2</sub>e/kWh) of forest-residues-to-bioelectricity pathways considering black carbon emissions. Lumber mill share is based on market-value allocation.

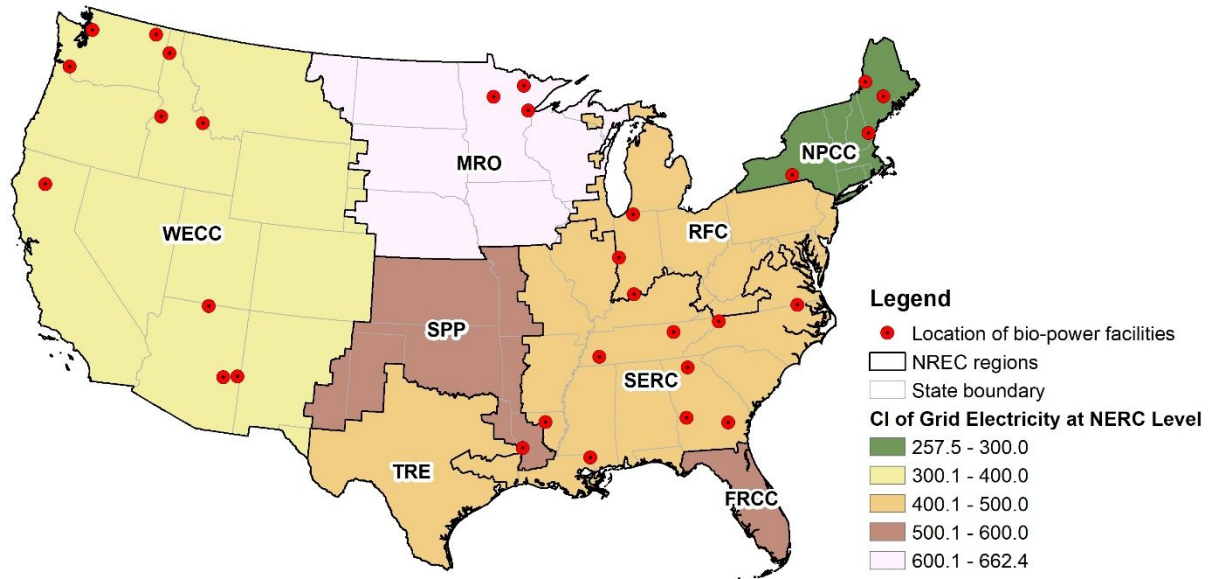

Figure S5. Boundaries of North American Electric Reliability Corporation (NERC) regions in the conterminous United States and spatial pattern of carbon intensities of grid electricity (g CO<sub>2</sub>e/kWh) across NERC regions. Carbon intensities of electricity generation at the NERC level are obtained from the GREET model.



Figure S6. Sensitivity analysis results for the state-level life-cycle GHG emissions of forest to electricity pathways.

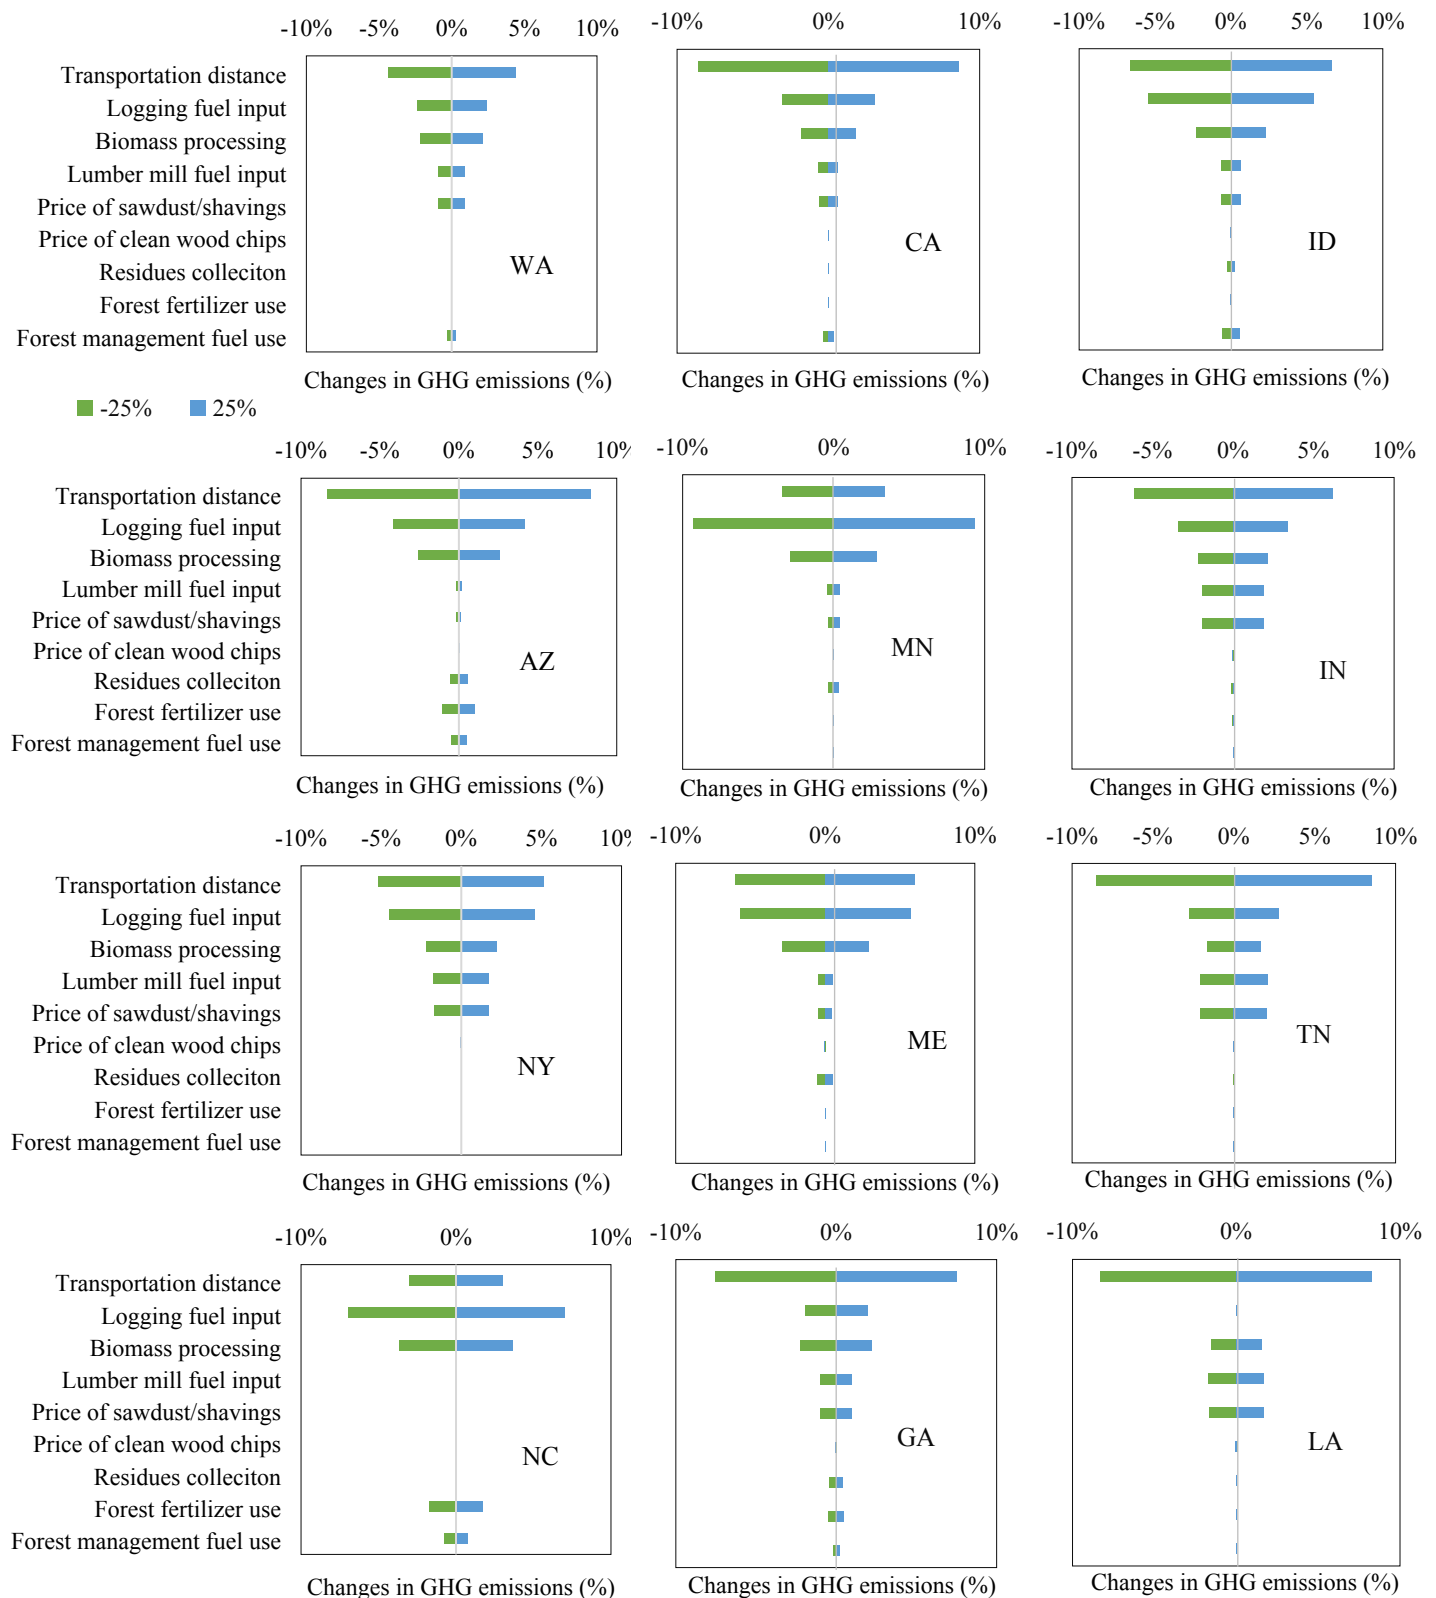

## Supporting Tables

Table S1. Assumptions for the hypothetical woody biomass power plant.

| Variable                               | Value   | Unit                        |
|----------------------------------------|---------|-----------------------------|
| Nameplate Capacity                     | 20      | MW/yr                       |
| Heat Rate                              | 15.826  | MJ/kWh                      |
| HHV                                    | 13.956  | MJ/kg biomass (dry)         |
| Capacity Factor                        | 0.6     | Fraction of production time |
| Annual Generation                      | 105,120 | MWh/yr                      |
| Feedstock Required                     | 119,204 | t /yr (dry basis)           |
| Moisture content of pulpwood feedstock | 45      | % (at forest landing)       |
| Moisture content of logging residues   | 30      | % (at forest landing)       |
| Moisture content of sawmill residues   | 30      | % (at lumber mill)          |

Table S2. Fuel and material inputs for site preparation, planting, and stand management. Natural regeneration is assumed for Northeast/North Central, thus there are no energy/material inputs.

| Inputs                        | Pacific Northwest | Inland Northwest | South East | Northeast/North-Central |
|-------------------------------|-------------------|------------------|------------|-------------------------|
| Energy Use (L/ha)             |                   |                  |            |                         |
| Diesel                        | 19.5              | 88.0             | 123.1      |                         |
| Gasoline                      | 4.2               | -                | -          |                         |
| Lubricants                    | 0.4               | 1.8              | 2.5        |                         |
| Kerosene/Jet Fuel             | 7.9               | -                | -          |                         |
| Electricity                   | -                 | -                | -          |                         |
| Fertilizer Use (grams/ha)     |                   |                  |            |                         |
| Nitrogen                      | 71,734            | 37.0             | 103,100    |                         |
| P <sub>2</sub> O <sub>5</sub> | 0                 | 62.0             | 12,800     |                         |
| K <sub>2</sub> O              | -                 | 152.0            | -          |                         |
| CaCO <sub>3</sub>             | -                 | -                | -          |                         |
| Pesticide Use (grams/ha)      |                   |                  |            |                         |
| Herbicide                     | 4,437             | -                | 1,360      |                         |
| Insecticide                   | -                 | -                | -          |                         |

Table S3. Energy inputs for logging in the Pacific Northwest region. Data is adapted from Oneil et al. (2017).<sup>1</sup>

| Steps            | Equipment            | Diesel Use (L/m3) | Lubricants (L/m3) |
|------------------|----------------------|-------------------|-------------------|
| Felling          | Large feller-buncher | 0.77              | 0.01              |
| Yarding          | Shovel yarder        | 3.56              | 0.06              |
| Sorting          | Large loader         | 0.35              | 0.01              |
| Processing       | Processor            | 1.01              | 0.02              |
| Loading          | Large loader         | 0.71              | 0.01              |
| <b>Sub-total</b> |                      | <b>6.39</b>       | <b>0.11</b>       |

Table S4. Energy inputs for logging in the Inland Pacific Northwest region. Data is adapted from Oneil et al. (2010).<sup>2</sup>

| Steps            | Equipment             | Diesel Use (L/m3) | Lubricants (L/m3) |
|------------------|-----------------------|-------------------|-------------------|
| Felling          | Large feller-buncher  | 0.37              | 0.01              |
| Skidding         | Large grapple skidder | 1.13              | 0.02              |
| Processing       | Processor             | 0.29              | 0.01              |
| Loading          | Large loader          | 0.77              | 0.01              |
| <b>Sub-total</b> |                       | <b>2.55</b>       | <b>0.05</b>       |

Table S5. Energy inputs for logging in the Northcentral region (except Tennessee). Data is adapted from Oneil et al. (2010).<sup>2</sup>

| Steps            | Equipment             | Diesel Use (L/m3) |             | Lubricants (L/m3) |             |
|------------------|-----------------------|-------------------|-------------|-------------------|-------------|
|                  |                       | Softwood          | Hardwood    | Softwood          | Hardwood    |
| Felling          | Large feller-buncher  | 1.02              | 0.07        | 0.02              | 0.00        |
| Skidding         | Large grapple skidder | 1.66              | 2.73        | 0.03              | 0.05        |
| Processing       | Processor             | 0.02              | 0.02        | 0.00              | 0.00        |
| Loading          | Large loader          | 1.44              | 1.44        | 0.03              | 0.03        |
| <b>Sub-total</b> |                       | <b>4.14</b>       | <b>4.27</b> | <b>0.07</b>       | <b>0.08</b> |

Table S6. Energy inputs for logging in Tennessee. Data is adapted from Abbas et al. (2018).<sup>3</sup>

| Type                   | Softwood | Hardwood |
|------------------------|----------|----------|
| Gasoline (L/dry ton)   | 1.32     | 1.50     |
| Diesel (L/dry ton)     | 9.03     | 9.62     |
| Lubricants (L/dry ton) | 0.64     | 0.68     |

Table S7. Energy inputs for logging in the Northeast. Data is adapted from Quinn et al. (2020).<sup>4</sup>

| Steps                      | Diesel fuel (L/dry ton) | Lubricants (L/dry ton) |
|----------------------------|-------------------------|------------------------|
| Felling, skidding, and BMP | 6.078                   | 0.122                  |
| Processing pulpwood        | 0.615                   | 0.012                  |
| <b>Subtotal</b>            | <b>6.693</b>            | <b>0.134</b>           |

Table S8. Energy inputs for logging in the Southeast region. Data is adapted from Lan et al. (in review).<sup>5</sup>

| Steps           | Equipment     | Diesel Use (L/m3) | Lubricant (L/m3) |
|-----------------|---------------|-------------------|------------------|
| Logging         | Not specified | 1.98              | 0.04             |
| <b>Subtotal</b> |               | <b>1.98</b>       | <b>0.04</b>      |

Table S9. Energy inputs for logging residues recovery. Data is adapted from Han et al. (2018)<sup>6</sup> and Lan et al. (in review).<sup>5</sup>

| Fuel Consumption       | Southeast | Pacific Northwest<br>and Inland<br>Pacific Northwest | Northeast/North<br>Central |
|------------------------|-----------|------------------------------------------------------|----------------------------|
| Diesel (L/dry ton)     | 2.89      | 3.45                                                 | 2.45                       |
| Gasoline (L/dry ton)   | -         | 0.06                                                 | -                          |
| Lubricants (L/dry ton) | -         | 0.07                                                 | -                          |

Table S10. Energy inputs for wood pellets production. Data for Southeast and Pacific Northwest regions are derived from Morrison and Gordon (2017)<sup>7</sup> and Brackely et al. (2017),<sup>8</sup> respectively.

| Energy inputs                    | Southeast Region |             | Pacific Northwest Region |             |
|----------------------------------|------------------|-------------|--------------------------|-------------|
|                                  | Drying           | Pelletizing | Drying                   | Pelletizing |
| Diesel (L/dry ton)               | -                | 2.5         | -                        | -           |
| Lubricants (L/dry ton)           | -                | 0.3         | -                        | -           |
| Electricity (KWh/dry ton)        | 40.6             | 162.2       | 30.0                     | 145.8       |
| Natural Gas (L/dry ton)          | -                | 0.01        | -                        | 0.2         |
| Biomass (waste wood, MJ/dry ton) | 589.0            | -           | 3203.8                   | -           |

Table S11. Break-down of life cycle GHG emissions by state for the pulpwood (softwood) to electricity pathway. States with zero transportation emissions indicate that pulpwood is not included in biomass supply mix simulated by LURA; values for other stages are included here for reference.

| Breakdown by stages    | WA   | CA   | ID   | AZ   | MN   | IN   | NY   | ME   | TN   | NC   | GA   | LA   |
|------------------------|------|------|------|------|------|------|------|------|------|------|------|------|
| Forest Management      | 2.5  | 2.5  | 2.5  | 5.6  | 0.0  | 0.0  | 0.0  | 0.0  | 0.0  | 5.6  | 5.6  | 5.6  |
| Harvest/Collection     | 20.6 | 20.6 | 25.1 | 15.2 | 32.2 | 24.1 | 21.7 | 23.0 | 37.3 | 15.2 | 15.2 | 15.2 |
| Biomass processing     | 6.3  | 6.3  | 6.5  | 6.3  | 6.7  | 6.3  | 6.3  | 6.7  | 6.3  | 6.3  | 6.3  | 6.3  |
| Lumber mill operation  | 0.0  | 0.0  | 0.0  | 0.0  | 0.0  | 0.0  | 0.0  | 0.0  | 0.0  | 0.0  | 0.0  | 0.0  |
| Transportation         | 5.1  | 9.3  | 11.1 | 13.0 | 7.9  | 10.5 | 10.0 | 10.3 | 13.3 | 6.7  | 9.4  | 0.0  |
| Electricity generation | 20.0 | 20.0 | 20.0 | 20.0 | 20.0 | 20.0 | 20.0 | 20.0 | 20.0 | 20.0 | 20.0 | 20.0 |
| Sum                    | 54.4 | 58.6 | 65.2 | 60.1 | 66.8 | 60.9 | 58.0 | 60.0 | 76.9 | 53.8 | 56.5 | 47.1 |

Table S12. Break-down of life cycle GHG emissions by state for the logging residues (softwood) to electricity pathway. States with zero transportation emissions indicate that logging residues are not included in biomass supply mix simulated by LURA; values for other stages are included here for reference.

| Breakdown by stages    | WA   | CA   | ID   | AZ   | MN   | IN   | NY   | ME   | TN   | NC   | GA   | LA   |
|------------------------|------|------|------|------|------|------|------|------|------|------|------|------|
| Forest Management      | 0.0  | 0.0  | 0.0  | 0.0  | 0.0  | 0.0  | 0.0  | 0.0  | 0.0  | 0.0  | 0.0  | 0.0  |
| Harvest/Collection     | 11.3 | 11.3 | 11.6 | 9.4  | 8.2  | 9.4  | 9.4  | 8.2  | 9.4  | 9.4  | 9.4  | 9.4  |
| Biomass processing     | 12.4 | 12.4 | 12.8 | 12.5 | 13.3 | 12.5 | 12.5 | 13.3 | 12.5 | 12.5 | 12.5 | 12.5 |
| Lumber mill operation  | 0.0  | 0.0  | 0.0  | 0.0  | 0.0  | 0.0  | 0.0  | 0.0  | 0.0  | 0.0  | 0.0  | 0.0  |
| Transportation         | 0.0  | 0.0  | 13.7 | 16.8 | 9.1  | 14.2 | 0.0  | 14.3 | 5.3  | 0.0  | 5.2  | 0.0  |
| Electricity generation | 20.0 | 20.0 | 20.0 | 20.0 | 20.0 | 20.0 | 20.0 | 20.0 | 20.0 | 20.0 | 20.0 | 20.0 |
| Sum                    | 43.7 | 43.7 | 58.1 | 58.7 | 50.6 | 56.1 | 41.9 | 55.8 | 47.2 | 41.9 | 47.1 | 41.9 |

Table S13. Break-down of life cycle GHG emissions by state for the mill residues (sawdust and shavings, softwood) to electricity pathway. States with zero transportation emissions indicate that mill residues are not included in biomass supply mix simulated by LURA; values for other stages are included here for reference.

| Breakdown by stages    | WA   | CA   | ID   | AZ   | MN   | IN   | NY   | ME   | TN   | NC   | GA   | LA   |
|------------------------|------|------|------|------|------|------|------|------|------|------|------|------|
| Forest Management      | 0.0  | 0.0  | 0.0  | 0.0  | 0.0  | 0.0  | 0.0  | 0.0  | 0.0  | 0.0  | 0.0  | 0.0  |
| Harvest/Collection     | 0.0  | 0.0  | 0.0  | 0.0  | 0.0  | 0.0  | 0.0  | 0.0  | 0.0  | 0.0  | 0.0  | 0.0  |
| Biomass processing     | 2.3  | 2.3  | 2.3  | 2.3  | 2.4  | 2.3  | 2.3  | 2.4  | 2.3  | 2.3  | 2.3  | 2.3  |
| Lumber mill operation  | 1.5  | 1.5  | 2.7  | 2.3  | 2.5  | 2.3  | 2.3  | 2.5  | 2.3  | 2.3  | 2.3  | 2.3  |
| Transportation         | 6.2  | 19.2 | 17.3 | 50.9 | 7.3  | 18.6 | 13.3 | 16.1 | 20.4 | 0.0  | 14.9 | 12.3 |
| Electricity generation | 20.0 | 20.0 | 20.0 | 20.0 | 20.0 | 20.0 | 20.0 | 20.0 | 20.0 | 20.0 | 20.0 | 20.0 |
| Sum                    | 29.9 | 42.9 | 42.3 | 75.4 | 32.2 | 43.3 | 37.9 | 41.0 | 45.0 | 24.5 | 39.4 | 36.8 |

Table S14. Break-down of life cycle GHG emissions by state for the wood pellet (sourced from pulpwood, softwood) to electricity pathway. States with zero transportation emissions indicate that mill residues are not included in biomass supply mix simulated by LURA; values for other stages are included here for reference.

| Breakdown by stages    | WA    | CA    | ID    | AZ    | MN    | IN    | NY    | ME    | TN    | NC    | GA    | LA    |
|------------------------|-------|-------|-------|-------|-------|-------|-------|-------|-------|-------|-------|-------|
| Forest Management      | 0.0   | 0.0   | 0.0   | 0.0   | 0.0   | 0.0   | 0.0   | 0.0   | 0.0   | 0.0   | 0.0   | 0.0   |
| Harvest/Collection     | 0.0   | 0.0   | 0.0   | 0.0   | 0.0   | 0.0   | 0.0   | 0.0   | 0.0   | 0.0   | 0.0   | 0.0   |
| Biomass processing     | 89.8  | 89.8  | 92.7  | 92.5  | 95.7  | 93.3  | 95.9  | 95.7  | 95.6  | 92.5  | 92.5  | 92.5  |
| Lumber mill operation  | 1.1   | 1.1   | 2.4   | 1.7   | 1.9   | 1.9   | 1.9   | 1.9   | 1.9   | 1.7   | 1.7   | 1.7   |
| Transportation         | 0.0   | 0.0   | 31.0  | 33.2  | 4.3   | 7.6   | 0.0   | 4.7   | 16.3  | 10.0  | 0.0   | 0.0   |
| Electricity generation | 20.0  | 20.0  | 20.0  | 20.0  | 20.0  | 20.0  | 20.0  | 20.0  | 20.0  | 20.0  | 20.0  | 20.0  |
| Sum                    | 110.8 | 110.8 | 146.0 | 147.4 | 122.0 | 122.8 | 117.9 | 122.4 | 133.8 | 124.2 | 114.2 | 114.2 |

Table S15. Break-down of life cycle GHG emissions by state for the wood pellet (sourced from pulpwood) to electricity pathway. States with zero transportation emissions indicate that mill residues are not included in biomass supply mix simulated by LURA; values for other stages are included here for reference.

| Breakdown by stages    | WA    | CA    | ID    | AZ    | MN    | IN    | NY    | ME    | TN    | NC    | GA    | LA    |
|------------------------|-------|-------|-------|-------|-------|-------|-------|-------|-------|-------|-------|-------|
| Forest Management      | 2.5   | 2.5   | 2.5   | 5.6   | 0.0   | 5.8   | 0.0   | 0.0   | 0.0   | 5.6   | 5.6   | 5.6   |
| Harvest/Collection     | 20.6  | 20.6  | 25.1  | 15.2  | 32.2  | 24.9  | 23.0  | 23.0  | 38.5  | 15.2  | 15.2  | 15.2  |
| Biomass processing     | 89.8  | 89.8  | 92.7  | 92.5  | 95.7  | 93.3  | 95.9  | 95.7  | 95.6  | 92.5  | 92.5  | 92.5  |
| Lumber mill operation  | 0.0   | 0.0   | 0.0   | 0.0   | 0.0   | 0.0   | 0.0   | 0.0   | 0.0   | 0.0   | 0.0   | 0.0   |
| Transportation         | 0.0   | 0.0   | 31.0  | 33.2  | 4.3   | 7.6   | 0.0   | 4.7   | 16.3  | 10.0  | 0.0   | 0.0   |
| Electricity generation | 20.0  | 20.0  | 20.0  | 20.0  | 20.0  | 20.0  | 20.0  | 20.0  | 20.0  | 20.0  | 20.0  | 20.0  |
| Sum                    | 132.8 | 132.8 | 171.2 | 166.5 | 152.2 | 151.6 | 138.9 | 143.4 | 170.4 | 143.4 | 133.4 | 133.4 |

Table S16. Comparison of economic value versus mass based allocation factors used for the sawing process (log to rough green lumber) at lumber mill. States within the same region share the same allocation factors.

| Products (green) | Mass-based allocation |       |       |            |            | Economic Allocation |       |       |            |            |
|------------------|-----------------------|-------|-------|------------|------------|---------------------|-------|-------|------------|------------|
|                  | PNW                   | INW   | SE    | NE/NC (SW) | NE/NC (HW) | PNW                 | INW   | SE    | NE/NC (SW) | NE/NC (HW) |
| lumber           | 50.1%                 | 52.0% | 52.2% | 34.0%      | 59.4%      | 91.8%               | 92.0% | 91.4% | 85.1%      | 95.1%      |
| chips            | 24.4%                 | 32.0% | 30.7% | 37.0%      | 15.5%      | 5.7%                | 7.2%  | 6.9%  | 11.8%      | 3.2%       |
| Sawdust/shavings | 5.6%                  | 4.0%  | 9.7%  | 11.0%      | 13.6%      | 0.7%                | 0.5%  | 1.1%  | 1.8%       | 1.4%       |
| hogfuel          | 13.8%                 | 1.0%  | 4.8%  | 5.0%       | 0.2%       | 1.7%                | 0.1%  | 0.6%  | 0.8%       | 0.0%       |
| bark             | 6.1%                  | 9.0%  | 2.6%  | 13.0%      | 11.2%      | 0.2%                | 0.2%  | 0.1%  | 0.5%       | 0.3%       |

Table S17. Comparison of economic value versus mass based allocation factors used for the planning process (rough saw lumber to planned lumber) at lumber mill. States within the same region share the same allocation factors.

| Products         | Mass-based allocation |       |       |               |               | Economic Allocation |       |       |               |               |
|------------------|-----------------------|-------|-------|---------------|---------------|---------------------|-------|-------|---------------|---------------|
|                  | PNW                   | INW   | SE    | NE/NC<br>(SW) | NE/NC<br>(HW) | PNW                 | INW   | SE    | NE/NC<br>(SW) | NE/NC<br>(HW) |
| Sawn lumber      | 88.7%                 | 82.0% | 90.1% | 90.0%         | 80.2%         | 99.1%               | 98.6% | 99.3% | 99.2%         | 98.4%         |
| Chips            | 1.3%                  | 0.0%  | 0.2%  | 1.0%          | 0.0%          | 0.2%                | 0.0%  | 0.0%  | 0.1%          | 0.0%          |
| Sawdust/shavings | 10.1%                 | 18.0% | 9.6%  | 9.0%          | 19.8%         | 0.7%                | 1.4%  | 0.7%  | 0.7%          | 1.6%          |
